# Supplementary material for: A ruthenium(iii) phosphonate complex on polyallylamine functionalized carbon nanotube multilayer films: self-assembly, direct electrochemistry, and electrocatalysis
Source: Royal Society of Chemistry journal article supplement (doi:10.1039/c3tb21433h), 2013-11-01
Supplement: c3tb21433h.pdf [file c3tb21433h.pdf]

**Supporting Information Available**

**Ruthenium(III) phosphonate complex on polyallylamine functionalized carbon  
nanotubes multilayer films: self-assembly, direct electrochemistry, and  
electrocatalysis**

*Pan Li, Hailing Liu, Jie Yang, Dongmei Sun, Yu Chen, \* Yiming Zhou, Chenxin  
Cai and Tianhong Lu*

Jiangsu Key Laboratory of New Power Batteries, Jiangsu Collaborative Innovation  
Centre of Biomedical Functional Materials, School of Chemistry and Materials  
Science, Nanjing Normal University, Nanjing 210023, PR China

Fax: +86-25-83243286; Tel: +86-25-85891651

E-mail: [ndchenyu@gmail.com](mailto:ndchenyu@gmail.com)

## Figures

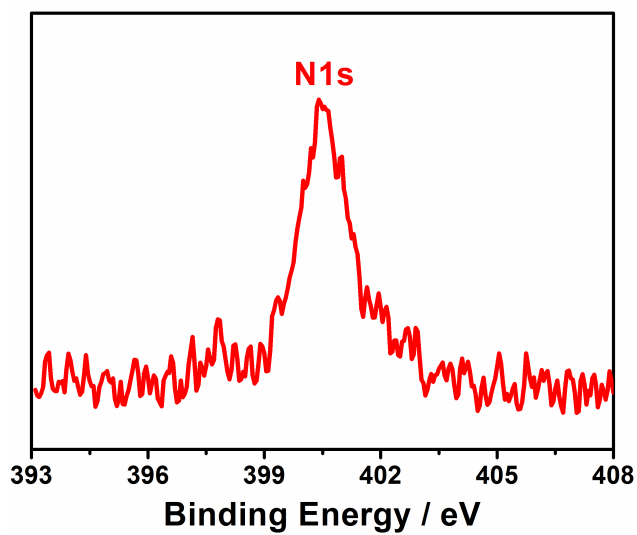

**Fig. S1** XPS spectra of PAH-MWCNTs-COOH hybrids in the N1s region.

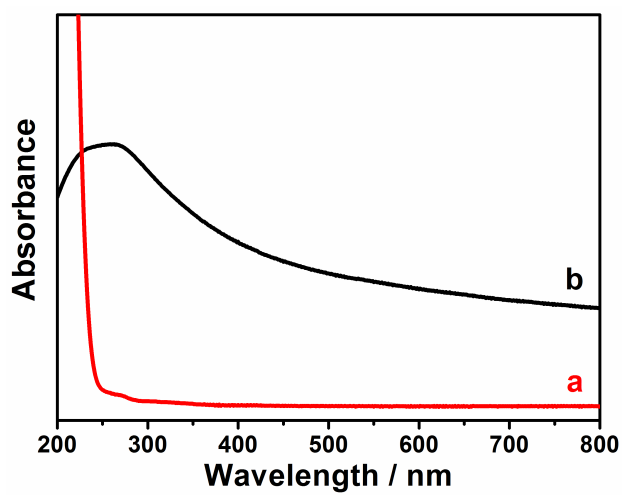

**Fig. S2** UV-vis spectra of (a) PAH, and (b) MWCNTs-COOH.

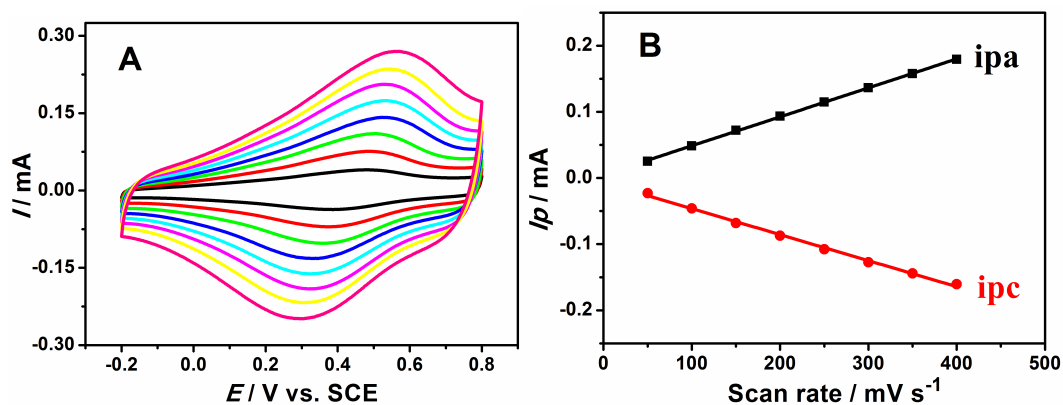

**Fig. S3** (A) Cyclic voltammograms of EDTMP-Ru<sup>III</sup>/ {PAH/MWCNTs-COOH}<sub>8</sub>/GC electrode in the 0.1 M pH 2.0 K<sub>2</sub>SO<sub>4</sub>-H<sub>2</sub>SO<sub>4</sub> solution at different scan rates. (B) Plots of the corresponding cathodic and anodic peak currents vs. scan rates.

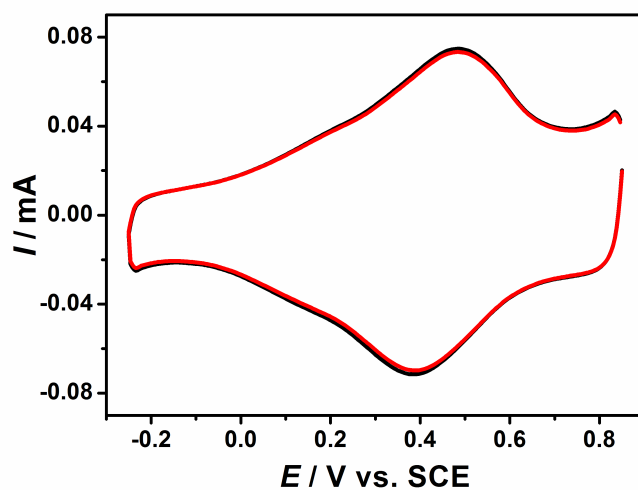

**Fig. S4.** Cyclic voltammograms of EDTMP-Ru<sup>III</sup>/ {PAH/MWCNTs-COOH}<sub>8</sub>/GC electrode in a 0.1 M pH 2.0 K<sub>2</sub>SO<sub>4</sub>-H<sub>2</sub>SO<sub>4</sub> solution at 1st cycle (black line) and 100th cycles (red line) at a scan rate of 100  $\text{mV s}^{-1}$ .

**Table S1.** Detection limit and linear range of amperometric determination of iodate on typical modified electrodes.

| electrode                                                      | detection limit/ $\mu\text{M}$ | linear range/ $\mu\text{M}$ | references         |
|----------------------------------------------------------------|--------------------------------|-----------------------------|--------------------|
| Fe(III)P-MWCNTs/GC                                             | 2.5                            | 10-4000                     | 1                  |
| V-complex-MWCNTs/GCE                                           | 0.35                           | 0.5-500                     | 2                  |
| Nano-Au/P3MT/GCE                                               | 1.4                            | 5.0-500                     | 3                  |
| Catalase-MWCNTs/GC                                             | 0.2                            | 1-5000                      | 4                  |
| Os-complex/SWCNTs/GC                                           | 0.038                          | 1-2500                      | 5                  |
| Nano-Pts/CS/GCE                                                | 0.86                           | 3-560                       | 6                  |
| RuON-GCE                                                       | 0.9                            | 1.5-518                     | 7                  |
| AMMOE                                                          | 0.5                            | 1-200                       | 8                  |
| WO <sub>3</sub> /PANI                                          | 2.7                            | 20-500                      | 9                  |
| EDTMP-Ru <sup>III</sup> /PAH/MWCN<br>Ts-COOH <sub>8</sub> /GCE | 0.03                           | 0.08-230                    | Proposed<br>method |

## References

- 1 A. Salimi, H. Mamkhezri, R. Hallaj and S. Zandi, *Electrochim. Acta*, 2007, **52**, 6097.
- 2 A. Salimi, H. Mamkhezri and S. Mohebbi, *Electrochem. Commun.*, 2006, **8**, 688.
- 3 X. Huang, Y. Li, Y. Chen and L. Wang, *Sensor. Actuat. B-Chem.*, 2008, **134**, 780.
- 4 A. Salimi, A. Noorbakhsh and M. Ghadermarzi, *Sensor. Actuat. B-Chem.*, 2007, **123**, 530.
- 5 A. Salimi, B. Kavosi, A. Babaei and R. Hallaj, *Anal. Chim. Acta*, 2008, **618**, 43.
- 6 Y. Li, Y. Zhou, H. Xian, L. Wang and J. Huo, *Anal. Sci.*, 2011, **27**, 1223.
- 7 F. Chatraei and H. R. Zare, *Mater. Sci. Eng. C*, 2013, **33**, 721.
- 8 L. Tian, L. Liu, L. Chen, N. Lu and H. Xu, *Sensor. Actuat. B-Chem.*, 2005, **105**, 484.
- 9 B. X. Zou, X. X. Liu, D. Diamond and K. T. Lau, *Electrochim. Acta*, 2010, **55**, 3915.
